# Supplementary material for: 25-Hydroxyvitamin D, 1,25-Dihydroxyvitamin D, and Peripheral Bone Densitometry in Adults with Celiac Disease
Source: PubMed Central journal article supplement (PMC7231255; doi:10.3390/nu12040929), 2020-03-27
Supplement: nutrients-12-00929-s001.pdf [file nutrients-12-00929-s001.pdf]

**Table S1** - Lab test comparison between untreated CeD and treated CeD in ANOVA

adjusted for sex and age: means.

|                                          | Untreated CeD | Treated CeD |                  |
|------------------------------------------|---------------|-------------|------------------|
| Number of patients                       | 50            | 55          | <i>P*</i>        |
| Recalibrated 25-hydroxy-vitamin D, ng/mL | 22.2          | 28.7        | <i>0.019</i>     |
| Serum PTH, pg/ mL                        | 72.2          | 51.0        | <i>&lt;0.001</i> |
| 1,25(OH <sub>2</sub> )-vitamin D, pg/mL  | 60.9          | 53.6        | <i>0.025</i>     |
| Serum total calcium, mg/dL               | 9.33          | 9.37        | <i>0.778</i>     |
| Serum phosphorus, mg/dL                  | 3.52          | 3.39        | <i>0.239</i>     |

\* by ANOVA

**Table S2** – Radius BMD in untreated CeD and treated CeD in ANOVA adjusted for sex and age: mean.

|                                                               | Untreated CeD | Treated CeD |              |
|---------------------------------------------------------------|---------------|-------------|--------------|
| Number of patients                                            | 41            | 46          | <i>P*</i>    |
| Distal radius total mineral density, mg/cm <sup>3</sup>       | 298           | 324         | <i>0.035</i> |
| Distal radius trabecular mineral density, mg/cm <sup>3</sup>  | 176           | 188         | <i>0.155</i> |
| Distal radius subcortical mineral density, mg/cm <sup>3</sup> | 407           | 434         | <i>0.137</i> |
| Diaphyseal radius cortical BMD, mg/cm <sup>3</sup>            | 1132          | 1158        | <i>0.002</i> |

\* by ANOVA
